# Supplementary material for: Scanning tunneling microscopy study of one-dimensional o-phthalaldehydechain reactions on the Si(100)-2 × 1:H surface
Source: Royal Society of Chemistry journal article supplement (doi:10.1039/b917502d), 2009-12-23
Supplement: b917502d.pdf [file b917502d.pdf]

## Electronic Supplementary Information

“Scanning tunneling microscopy study of one-dimensional o-phthalaldehyde chain reactions on the Si(100)-2x1:H surface”

Michael A. Walsh and Mark C. Hersam

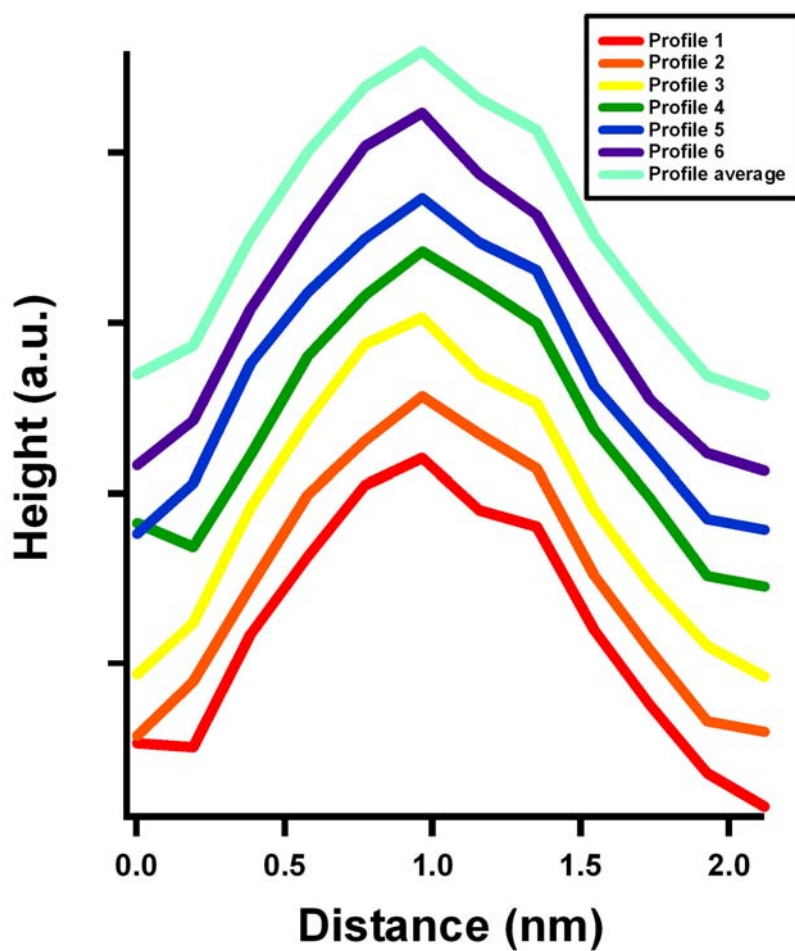

**Figure S1.** Several cross-sectional profiles and the average of the profiles for the type A nanostructures. Each of the profiles is offset vertically for clarity.

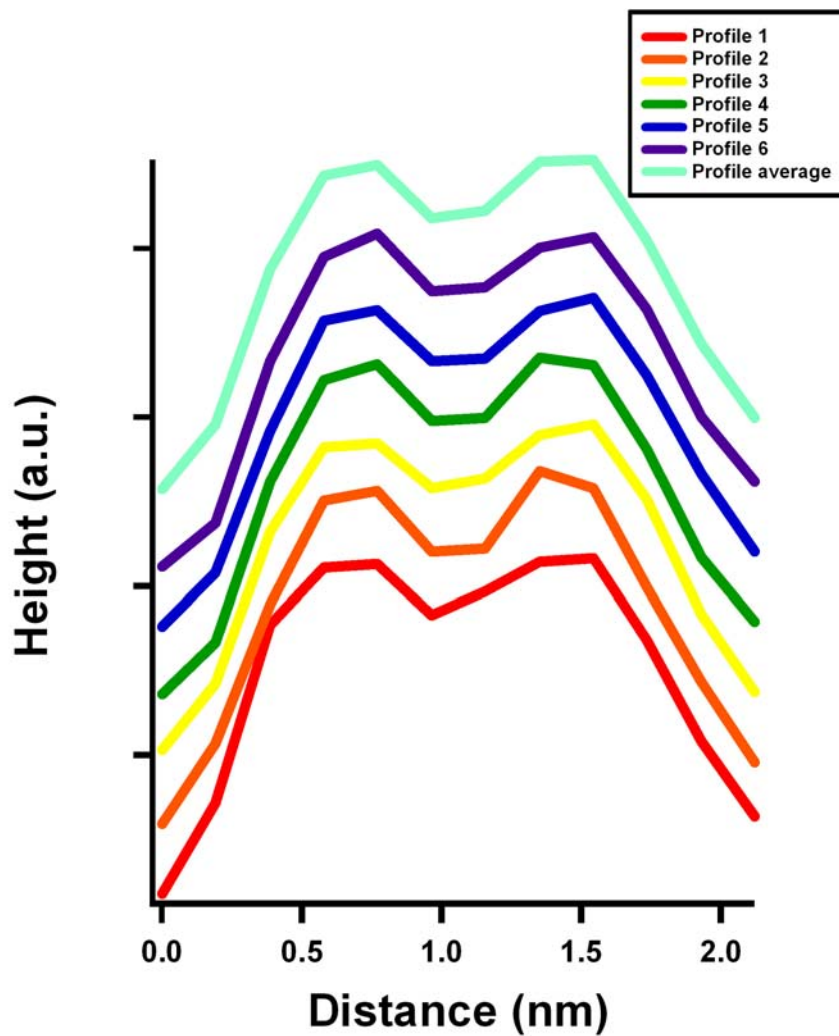

**Figure S2.** Several cross-sectional profiles and the average of the profiles for the type B nanostructures. Each of the profiles is offset vertically for clarity.

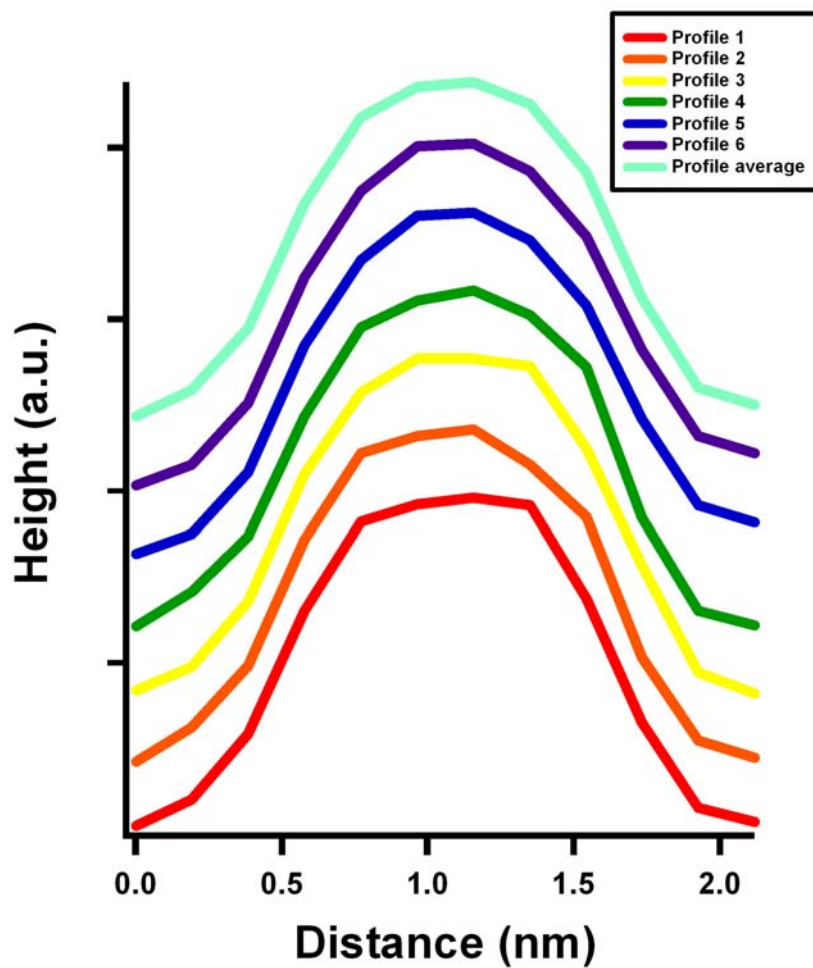

**Figure S3.** Several cross-sectional profiles and the average of the profiles for the type C nanostructures. Each of the profiles is offset vertically for clarity.
